# Supplementary material for: Lower Body Positive Pressure Treadmill Training for Pediatric Gait Disorders: A Scoping Review
Source: Preprints.org preprint supplement (doi:10.20944/preprints202112.0014.v1), 2021-12-01
Supplement: Supplementary file 1 [file supplementary]

## Sheet: Medline (Ovid)
1	((''Anti-gravit*'' or ''Antigravit*'' or AlterG or ''Altered gravit*'' or Hypogravit* or Weightlessness or ''Artificial Gravit*'' or ''Low Gravit*'' or ''Reduced Gravit*'' or ''Zero Gravit*'' or Microgravit* or "lower body positive pressure") adj2 (Treadmill* or ''Exercise test*'' or Training)).ti,ab.	Concept 1 - Vocabulaire libre	126
2	exp Gravitation/	Concept 1 - Vocabbulaire contrôlé	14.738
3		1 ou 2	14.834
4	(locomotion or gait or walking or "lower limb function" or ''gait deviation'' or postural or balance or spasticity or ''Muscle Hypertonia'' or "muscle strength" or "muscle weakness" or "range of motion").ti,ab.	Concept 2 - Vocabulaire libre	449.589
5	locomotion/ or Postural Balance/ or exp Gait Disorders, Neurologic/ or exp Muscle Hypertonia/ or Muscle Strength/	Concept 2 - Vocabbulaire contrôlé	91104
6		4 ou 5	490744
7	(child* or youth* or teen* or adolescen* or pe?diatric* or girl* or boy* or ''young adult*'').ti,ab.	Concept 3 - Vocabulaire libre	1,952,046
8	Child/ OR exp Adolescent/ OR Young Adult/	Concept 3 - Vocabbulaire contrôlé	3,362,667
9		7 ou 8	4,087,667
10
11
12		1 et 2 et 3	198
13
14
15
16
17
18
19
20
21

## Sheet: EMBASE
1	(('anti-gravit*' OR 'antigravit*' OR alterg OR 'altered gravit*' OR hypogravit* OR weightlessness OR 'artificial gravit*' OR 'low gravit*' OR 'reduced gravit*' OR 'zero gravit*' OR microgravit* OR 'lower body positive pressure') NEAR/2 (treadmill* OR 'exercise test*' OR training)):ab,ti	Concept 1 - Vocabulaire libre	152
2	'gravity'/de OR 'altered gravity'/de OR 'gravitational stress'/de OR 'microgravity'/de OR 'weightlessness'/de	Concept 1 - Vocabbulaire contrôlé	29,312
3		1 ou 2	29.399
4	(locomotion OR gait OR walking OR 'lower limb function' OR 'gait disorder*' OR 'gait deviation' OR postural:ab,ti OR balance OR spasticity OR 'muscle hypertonia' OR 'muscle strength' OR 'muscle weakness' OR 'range of motion'):ab,ti	Concept 2 - Vocabulaire libre	607.089
5	'locomotion'/de OR 'walking'/exp OR 'neurologic gait disorder'/exp OR 'body equilibrium'/de OR 'muscle hypertonia'/exp OR 'muscle strength'/de	Concept 2 - Vocabbulaire contrôlé	335,582
6		4 ou 5	758.782
7	(child* OR youth* OR teen* OR adolescen* OR pe?diatric* OR girl* OR boy* OR 'young adult*'):ab,ti	Concept 3 - Vocabulaire libre	2,445,952
8	'child'/exp OR 'adolescent'/exp OR 'young adult'/de	Concept 3 - Vocabbulaire contrôlé	4,173,288
9		7 ou 8	4,782,541
10
11
12		3 et 6 et 9	421
13
14
15
16
17
18
19
20
21

## Sheet: CINALH
	1	TI (('Anti-gravit*'' or ''Antigravit*'' or AlterG or ''Altered gravit*'' or Hypogravit* or Weightlessness or ''Artificial Gravit*'' or ''Low Gravit*'' or ''Reduced Gravit*'' or ''Zero Gravit*'' or Microgravit* or "lower body positive pressure") N2 (Treadmill* OR “Exercise test*” OR Training)) OR AB (('Anti-gravit*'' or ''Antigravit*'' or AlterG or ''Altered gravit*'' or Hypogravit* or Weightlessn…	Concept 1 - Vocabulaire libre			101
	2	(MH "Gravitation+")	Concept 1 - Vocabbulaire contrôlé			765
	3		1 ou 2			845
	4	TI ((locomotion or gait or walking or "lower limb function" or "gait disorders'' or postural or balance or spasticity or ''Muscle Hypertonia'' or "muscle strength" or "muscle weakness" or "range of motion") ) OR AB ((locomotion or gait or walking or "lower limb function" or or "gait deviation'' or postural or balance or spasticity or ''Muscle Hypertonia'' or "muscle strength" or "muscle weakness"…	Concept 2 - Vocabulaire libre			45.585
	5	(MH "Locomotion+") OR (MH "Gait Disorders, Neurologic") OR (MH "Balance, Postural») OR (MH "Muscle Hypertonia+") OR (MH "Muscle Strength")	Concept 2 - Vocabbulaire contrôlé			36.597
	6		4 ou 5			67.34
	7	TI (child* or youth* or teen* or adolescen* or pe#diatric* or girl* or boy* or ''young adult*'') OR AB (child* or youth* or teen* or adolescen* or pediatric* or girl* or boy* or ''young adult*'')	Concept 3 - Vocabulaire libre			758.806
	8	(MH "Child") OR (MH "Adolescence+") OR (MH "Young Adult")	Concept 3 - Vocabbulaire contrôlé			942.471
	9		7 ou 8			1,247,909
	10
	11		3 et 6 et 9			26
	12
	13
	14
	15
	16
	17
	18
		(anti-gravity training OR anti-gravity treadmill training OR AlterG OR lower body positive pressure treadmill training) AND (gait OR walking OR mobility OR ambulation OR walking capacity OR motor OR balance OR postural OR stability OR spasticity OR tone OR strength OR muscle weakness OR function OR range of motion) AND (child* OR adolescent* OR youth OR young adult* OR teenager*).
		Mettre tous les guillemets
		Mettre la troncature
		Ajouter vocabulaire contôlé

## Sheet: Web of science
WEB OF SCIENCE
	("Anti-gravit*" OR Antigravit* or alters or "Altered gravit*" or Hypogravit* or Weightlessness or "Artificial Gravit*" or "Low Gravit*" or "Reduced Gravit*" or "Zero Gravit*" or Microgravit* or "lower body positive pressure") NEAR/2 (Treadmill* OR "Exercise test*" OR Training) (Topic) and locomotion or gait or walking or "lower limb function" or "gait disorders" or postural or balance or spastici…
32 ARTICLES
